1 Three-dimensional experiments and individual based  
2 simulations show that cell proliferation drives melanoma nest  
3 formation in human skin tissue

4

5 Parvathi Haridas<sup>1,2</sup>, Alexander P. Browning<sup>2</sup>, Jacqui A. McGovern<sup>1</sup>, D.L. Sean McElwain<sup>1,2</sup>,  
6 Matthew J. Simpson<sup>1,2\*</sup>

7

8 <sup>1</sup> Institute of Health and Biomedical Innovation, Queensland University of Technology (QUT), Kelvin  
9 Grove 4059, Australia.

10 <sup>2</sup> School of Mathematical Sciences, QUT, Brisbane 4001, Australia.

11 \*matthew.simpson@qut.edu.au

12 **Abstract**

13 **Background**

14 Melanoma can be diagnosed by identifying nests of cells on the skin surface. Understanding  
15 the processes that drive nest formation is important as these processes could be potential  
16 targets for new cancer drugs. Cell proliferation and cell migration are two potential  
17 mechanisms that could conceivably drive melanoma nest formation. However, it is unclear  
18 which one of these two putative mechanisms plays a dominant role in driving nest formation.

19 **Results**

20 We use a suite of three-dimensional (3D) experiments in human skin tissue and a parallel  
21 series of 3D individual-based simulations to explore whether cell migration or cell  
22 proliferation plays a dominant role in nest formation. In the experiments we measure nest  
23 formation in populations of irradiated (non-proliferative) and non-irradiated (proliferative)  
24 melanoma cells, cultured together with primary keratinocyte and fibroblast cells on a 3D  
25 experimental human skin model. Results show that nest size depends on initial cell number  
26 and is driven primarily by cell proliferation rather than cell migration.

27 **Conclusions**

28 We find that nest size depends on initial cell number, and is driven primarily by cell  
29 proliferation rather than cell migration. All experimental results are consistent with  
30 simulation data from a 3D individual based model (IBM) of cell migration and cell  
31 proliferation.

32

33

34 **Keywords**

35 nest, melanoma nest, cell migration, cell proliferation, individual based model, melanoma  
36 cells, mathematical simulation, 3D human skin model, cluster, colony, barrier assay.

37

38

39

40

41

42

43

44

45

46

47

48

49

50

51

52

## 53 **Background**

54 Clusters of melanoma cells, called *nests*, are a prominent feature of melanomas [1,2].  
55 Identifying the presence and characteristics of melanoma nests in human skin is an essential  
56 diagnostic tool [3,4]. Recent 3D experimental work by Wessels *et al.* [5] suggests that  
57 melanoma nest formation in Matrigel is driven by cell migration. However, nest formation  
58 might be different in human skin, where melanoma cells are in contact with other cell types  
59 [1,6]. We hypothesise that two different mechanisms could lead to nest formation: (i) cell  
60 proliferation, where clusters of melanoma cells are formed primarily through mitosis (Figure  
61 1A); and (ii) cell migration, where clusters of adhesive melanoma cells form primarily  
62 through melanoma cell migration (Figure 1B).

63 We use a 3D human skin experimental model [7,8] to discriminate between these two  
64 conceptual models by performing a suite of experiments in which we systematically vary the  
65 initial density of proliferative melanoma cells placed on 3D human skin. This initial series of  
66 experiments allow us to examine the role of initial cell number in driving nest formation. All  
67 experiments are then repeated using non-proliferative, gamma-irradiated melanoma cells. We  
68 find that higher initial numbers of melanoma cells lead to larger nests, and that cell  
69 proliferation leads to dramatically-larger nests. All experimental outcomes are consistent with  
70 a series of 3D simulations from an IBM [9]. These results provide insight into the  
71 mechanisms driving nest formation, showing that the mechanisms in 3D human skin are  
72 different to monoculture experiments performed in Matrigel.

73

74

75

76 **Results and Discussion**

77 **Confirmation that irradiated melanoma cells do not proliferate and are capable of**  
78 **migrating in a two-dimensional barrier assay**

79 Experiments involving populations of proliferative melanoma cells are performed using non-  
80 irradiated SK-MEL-28 cells [10]. Experiments where melanoma cell proliferation is  
81 suppressed are performed using irradiated, but otherwise identical SK-MEL-28 cells [11,12].  
82 The melanoma cells are gamma-irradiated to inhibit mitosis. We perform a series of live  
83 assays to show that irradiation does not affect the adherence or morphology of melanoma  
84 cells. Furthermore, the live assay confirms that irradiated melanoma cells do not proliferate,  
85 and that the irradiation does not cause the cells to die [see Additional file 1].

86 Two-dimensional (2D) barrier assays confirm that irradiated melanoma cells survive and  
87 migrate. Populations of irradiated melanoma cells are monitored over four days to confirm  
88 that irradiation does not impede the ability of cells to migrate. We use circular barrier assays  
89 to compare the spatial expansion of irradiated and non-irradiated melanoma cell populations.  
90 The leading edge of the spreading populations is detected using ImageJ [13], which also  
91 provides an estimate of the area occupied by the spreading population of cells. Since the  
92 spreading populations of cells maintain an approximately circular shape, we convert the  
93 estimates of area into an equivalent diameter and we report data in terms of the diameter of  
94 the spreading population. Results are obtained in triplicate. Images in Figure 2A-B show the  
95 increase in the diameter of the spreading cell populations for both irradiated and non-  
96 irradiated melanoma cells over four days. The upper row of images in Figure 2A-B, show  
97 increased spatial expansion of the population of non-irradiated cells compared to the  
98 population of irradiated melanoma cells in the lower row. Since irradiated melanoma cells do  
99 not proliferate, we expect that the size of the expanding population of irradiated cells will be

100 smaller than the size of the expanding population of non-irradiated cells [14]. However, the  
101 area occupied by the population of irradiated melanoma cells increases over the four-day  
102 period, and this increase is due to cell migration alone. To confirm these visual observations,  
103 we also quantify the spatial spreading of irradiated and non-irradiated melanoma cell  
104 populations.

105 Data in Figure 2C shows the increase in diameter of both irradiated and non-irradiated  
106 melanoma cell populations. At all times considered, the average diameter of the irradiated  
107 cell population is less than the average diameter of the non-irradiated cell population. This is  
108 expected because the irradiated melanoma cells do not proliferate, and it is known that  
109 proliferative populations of cells expand and invade the surrounding empty space faster than  
110 non-proliferative populations of cells [9,14]. Most importantly, the experiments initialised  
111 with irradiated melanoma cells show an increase in the diameter of the spreading population,  
112 confirming that irradiation does not prevent migration. All experiments are performed in  
113 triplicate and the averaged results are presented. We now use both, irradiated and non-  
114 irradiated melanoma cells in 3D experiments to identify the mechanism that drives melanoma  
115 nest formation.

### 116 **Identifying the dominant mechanism driving melanoma nest formation**

117 Nests of melanoma cells are well-characterised histological features of melanoma  
118 progression. Early identification of these nests is critical for successful melanoma treatment.  
119 However, in addition to examining the presence of melanoma nests, it is important to identify  
120 the biological mechanisms that lead to nest formation as this information might be relevant to  
121 the development of new drugs. To examine these pathways we use a 3D experimental skin  
122 model.

123 Irradiated and non-irradiated melanoma cells are cultured with primary keratinocytes and  
124 primary fibroblasts in the 3D experimental skin model for four days. From this point we refer  
125 to keratinocyte and fibroblast cells as *skin* cells. All cells are initially placed onto the 3D  
126 experimental skin model as a monolayer, as uniformly as possible. MTT (3-(4,5-  
127 dimethylthiazol-2-yl)-2,5-diphenyltetrazolium bromide) assays highlight the metabolic  
128 activity of all cells, and show the spatial extent and spatial structure of cells on the top surface  
129 of the 3D experimental skin model. Images in Figure 3A-B show prominent dark purple  
130 clusters on the surface of some 3D experimental skin models. Control studies, where 3D  
131 experiments are constructed without melanoma cells, show a complete absence of nests [see  
132 Additional file 1] suggesting that the dark purple clusters in Figure 3A-B are melanoma nests.

133 Images in Figure 3A show that larger nests are associated with higher initial numbers of  
134 melanoma cells. To quantify this we measure the area of individual nests using ImageJ [13],  
135 and data in Figure 3C confirms our visual observation. Interestingly, larger initial numbers of  
136 melanoma cells lead to a smaller number of larger nests [see Additional file 2]. This is  
137 consistent with smaller sized nests coalescing into a smaller number of larger nests over time.  
138 Since cell number plays a critical role, we will also examine the role of proliferation by  
139 suppressing mitosis.

140 We examine the role of cell proliferation by constructing 3D experimental skin models with  
141 irradiated melanoma cells. Images in Figure 3B show that this leads to the formation of  
142 dramatically smaller nests. To quantify our results, the area of individual nests is measured  
143 using ImageJ [13] [see Additional file 2]. Data in Figure 3D shows a similar trend to data in  
144 Figure 3C as the nest area increases with initial cell number. However, comparing results in  
145 Figure 3C-D shows that proliferation plays a dominant role in nest formation. For example,  
146 experiments initialised with 8500 proliferative melanoma cells leads to a median nest area of  
147  $0.15 \text{ mm}^2$ , whereas the median nest area is just  $0.027 \text{ mm}^2$  when proliferation is suppressed.

148 Our results are different to previous 3D studies that show melanoma nests are formed by cell  
149 migration [5]. We anticipate that the difference in our outcome could be due to: (i)  
150 differences between the melanoma cell lines used; (ii) the interaction of melanoma cells with  
151 the surrounding skin cells in our 3D experiments; or, (iii) differences in the material used to  
152 construct the 3D model. Since our experiments are performed in 3D materials derived from  
153 human skin, and our experiments involve culturing melanoma cells together with primary  
154 human skin cells, we feel that our results are more realistic than examining nest formation in  
155 monoculture experiments in Matrigel. We now perform immunohistochemistry to confirm  
156 that irradiated melanoma cells survive in the 3D experimental human skin model over a  
157 period of four days.

#### 158 **Irradiated melanoma cells survive in a 3D experimental skin model**

159 Here, we perform a series of experiments using a specific melanoma marker to provide  
160 additional evidence that nests observed on the 3D experimental human skin models are  
161 clusters of melanoma cells, and that irradiated melanoma cells survive in a 3D environment  
162 over four days. The 3D experimental skin models are constructed using both irradiated and  
163 non-irradiated melanoma cells. Vertical cross-sections through the 3D experimental skin  
164 models initialised with melanoma cells are stained using S100, which is a reliable melanoma  
165 cell marker [15]. Both irradiated and non-irradiated melanoma cells are found in the 3D  
166 experimental skin model after four days. Images in Figure 4A-F show positive S100 staining  
167 of melanoma cells. In particular, Figure 4B,D,F show positive S100 staining of irradiated  
168 melanoma cells after four days. This immunostaining confirms that irradiation does not alter  
169 the antigen properties of melanoma cells, and the irradiated melanoma cells survive in a 3D  
170 experimental skin model for four days. Our experimental results use skin cells and skin  
171 dermis from one donor. Additional results using cells and dermis from two other donors show  
172 little variability between them.



## 173 **Variability between skin samples**

174 We now examine whether there is any important variability in our results between skin  
175 samples from different donors. To examine this we perform additional experiments using  
176 dermis and primary skin cells from three different donors, which we denote as donor A,  
177 donor B and donor C. We show MTT assays on the 3D experimental skin models initialised  
178 with non-irradiated and irradiated melanoma cells in Figure 5. The upper row of images in  
179 Figure 5A-C show 3D experimental skin models initialised with 1250, 5000 and 8500 non-  
180 irradiated melanoma cells, respectively. In each case, we see that larger nests are associated  
181 with higher initial number of melanoma cells. A similar trend is observed for the images in  
182 the lower row of images in Figure 5A-C where the experiments are initialised with an  
183 equivalent number of irradiated melanoma cells. However, regardless of whether we  
184 consider results from donor A, donor B or donor C, we always see that nest formation is  
185 dramatically reduced when we consider irradiated, non-proliferative melanoma cells.

186 Visual inspection of the images in Figure 5 suggests that the size, shape and number of  
187 individual nests does vary slightly between the three donors. However, the influence of the  
188 initial cell number and the action of cell proliferation on nest formation remains consistent  
189 between the skin samples from the three different donors. That is, larger initial numbers of  
190 cells produces larger nests, and the action of cell proliferation leads to dramatically larger  
191 nests. To provide additional evidence we also measure the area of individual nests on skin  
192 samples from all donors using ImageJ [13]. Data provided [see Additional file 2] confirm that  
193 the relationship between initial cell number and the action of cell proliferation holds for all  
194 three donor samples.

195 The nests on the 3D experimental skin model initialised with 1250 irradiated melanoma cells  
196 are very small. Most experimental replicates of this particular experiment do not lead to any

197 visually observable nests, as shown in the lower row of images in Figure 5A. Therefore, data  
198 for nest area in these experiments is omitted [see Additional file 2]. We now use an IBM to  
199 verify our experimental outcomes.

## 200 **Modelling melanoma nest formation using an individual based model**

201 To corroborate our experimental findings, we use an IBM to simulate the key features of the  
202 experiments. It is well-known that it can be difficult to quantitatively calibrate stochastic  
203 IBMs to match complicated experimental data precisely [16]. Therefore we use parameters in  
204 the IBM that are adapted from previous work [9,17]. This approach allows us to focus on  
205 understanding the roles of the key underlying biological features, such as the role of cell  
206 migration and cell proliferation, without being distracted by the secondary task of obtaining  
207 precise parameter estimates. We achieve this by using previously determined parameter  
208 estimates and simply comparing simulation results where melanoma cell proliferation is  
209 present, with simulation results where melanoma cell proliferation is suppressed.

210 The IBM describes the spatial distribution of simulated cells on a 3D square lattice [18]. We  
211 use a 3D lattice of cross section 3 mm  $\times$  3 mm, and depth 2 mm, to represent the central  
212 region of each experimental 3D skin model (Figure 6A). Simulated cells are called *agents*.  
213 We consider non-adhesive skin agents (green, Figure 6B) and adhesive melanoma agents  
214 (blue, Figure 6B).

215 To initialise the IBM simulations, we randomly place a particular number of skin and  
216 melanoma agents onto the surface of the 3D lattice. The initial number of agents in each  
217 subpopulation is chosen to match to the initial cell density in the experiments. Figures 6B-D  
218 show smaller sub-regions of the 3D simulated skin to visualise the distribution of agents on  
219 the 3D lattice as clearly as possible. Results in Figure 6B-C show that the IBM predicts the  
220 formation of clusters of adhesive melanoma agents on the surface of the 3D lattice. Results in

221 Figure 6D shows how the IBM predicts the downward movement of both skin and melanoma  
222 agents. Results in Figure 6D show that skin agents move deeper into the 3D lattice than the  
223 melanoma agents, while nests of melanoma agents tend to remain on the surface. Overall, the  
224 spatial arrangement of skin and melanoma agents in the IBM (Figure 6B-D) is similar to the  
225 spatial arrangement of cells in the 3D experiments (Figure 3-4) [6].

226 To explore the role of initial melanoma cell number in nest formation, IBM results in Figure  
227 6E show that nests form on the surface of the 3D lattice, and that the trends in simulated nest  
228 area are similar to those in the corresponding experiments. Therefore, the simulation  
229 outcomes in Figure 6E confirm that initial melanoma cell number is an important factor in  
230 driving nest formation. We also explore the role of cell proliferation by repeating the  
231 simulations in Figure 6E without any melanoma agent proliferation. Simulation results in  
232 Figure 6F are comparable to the corresponding experimental results, as we observe similar  
233 trends in nest size and morphology. In conclusion, similar to the experiments, our 3D  
234 simulation results indicate that melanoma nest formation is driven by initial melanoma cell  
235 number, and that the presence of melanoma proliferation leads to dramatically-larger nests.

## 236 **Conclusion**

237 Our combined experimental and simulation findings demonstrate that cell proliferation plays  
238 the dominant role in melanoma nest formation. While it is well-accepted that proliferation is  
239 important in the latter stages of tumour growth [19] and in the spatial spreading of cell  
240 populations [20], our work shows that proliferation is vitally important at the very earliest  
241 stages of melanoma progression.

242 Our results, pointing to the importance of cell proliferation, are interesting for a number of  
243 reasons: (i) previous monoculture experiments report that melanoma nests are formed by cell  
244 migration in Matrigel [5]. One potential explanation for this difference is that the Matrigel

245 experiments are very different to our experiments since we study nest formation on 3D  
246 human tissues where melanoma cells are in contact with skin cells; (ii) some previous  
247 mathematical models of cluster/nest formation focus on cell migration only, e.g. [21],  
248 whereas we find that cell proliferation plays the most important role; and (iii) our findings  
249 about the importance of cell proliferation in melanoma progression are consistent with the  
250 fact that many promising melanoma drugs aim to suppress proliferation [22,23,24].

## 251 **Methods**

### 252 **Keratinocyte isolation and culture**

253 Queensland University of Technology (QUT) human research ethics obtained written  
254 approval for the skin samples to be used in this study (approval number: QUT HREC  
255 #1300000063; UnitingCare Health 2003/46). Skin samples are collected from patients  
256 undergoing elective plastic surgery. Human keratinocyte cells are isolated from skin and  
257 cultured in full Green's medium following protocols described previously [15,25]. Primary  
258 keratinocyte cells are cultured at 37 °C, in 5% CO<sub>2</sub> and 95% air.

### 259 **Fibroblast isolation and culture**

260 Human fibroblast cells are isolated following protocols in Haridas *et al.* [15]. Primary  
261 fibroblast cells are cultured at 37 °C, in 5% CO<sub>2</sub> and 95% air.

### 262 **Melanoma cell culture**

263 The human melanoma cell line SK-MEL-28 is cultured as described in Haridas *et al.* [15].  
264 SK-MEL-28 melanoma cells are kindly donated by Professor Brian Gabrielli (Mater  
265 Research Institute-University of Queensland). Cells are cultured at 37 °C, in 5% CO<sub>2</sub> and  
266 95% air.

267 A batch of SK-MEL-28 melanoma cells is irradiated to prevent cell proliferation.  
268 Approximately  $1 \times 10^7$  melanoma cells are gamma-irradiated using a Gammacell 40 research  
269 irradiator (Australia) at approximately 0.8 Gy/minute for one hour resulting in a cumulative  
270 dose of 50 Gy. We refer to these non-proliferative cells as *irradiated* melanoma cells, and the  
271 proliferative cells as *non-irradiated* melanoma cells.

272 Identification of SK-MEL-28 cells is validated using short tandem repeat profiling (Cell  
273 Bank, Australia. January 2015).

#### 274 **Barrier assay**

275 We perform circular barrier assays to observe and measure the spreading of populations of  
276 irradiated and non-irradiated melanoma cells. The protocol from Simpson *et al.* [14] is  
277 followed. Briefly, sterile stainless steel silicon barriers (Aix Scientific, Germany) are  
278 carefully placed in a 24-well tissue culture plate with 0.5 ml growth medium. The tissue  
279 culture plate containing cells is incubated for one hour at 37 °C, in 5% CO<sub>2</sub> and 95% air.  
280 Viable cell suspensions of 20000 cells/100 µl of irradiated and non-irradiated melanoma cells  
281 are carefully introduced into the barriers to ensure an even distribution of cells. The tissue  
282 culture plates containing cell suspensions are incubated for a further two hours to allow cells  
283 to attach to the plate. The barriers are removed and the cell layers are washed with serum-free  
284 medium (culture medium without foetal calf serum) and replaced with fresh growth medium.  
285 Plates are then incubated at 37 °C, in 5% CO<sub>2</sub> and 95% air for zero, two and four days. We  
286 replace the growth medium after two days to replenish the nutrients. Each assay is performed  
287 in triplicate.

288

289

## 290 **Crystal violet staining**

291 We use the staining technique described by Simpson *et al.* [14] to analyse the barrier assays.  
292 In brief, cell monolayers are washed with phosphate buffered saline (PBS; Thermo Scientific,  
293 Australia) and fixed using 10% neutral buffered saline (United Biosciences, Australia) for 20  
294 minutes at room temperature. The fixed cells are stained using 0.01% v/v crystal violet  
295 (Sigma Aldrich, Australia) in PBS for 20 minutes at room temperature. Excess crystal violet  
296 stain is removed using PBS, and the plates are air-dried. Images of irradiated and non-  
297 irradiated cell populations are acquired using a Nikon SMZ 800 stereo microscope fitted with  
298 a Nikon digital camera.

## 299 **Establishing 3D experimental skin model with melanoma cells**

300 We establish 3D experimental skin models using the skin collected from donors undergoing  
301 elective plastic surgery. The protocol for establishing the 3D skin equivalent model with  
302 melanoma cells is adapted from previous work [7]. In brief, sterile stainless steel rings (Aix  
303 Scientifics) with a radius of 3 mm are placed on the papillary side of the de-epidermised  
304 dermis in a 24-well tissue culture plate (Nunc®, Australia). We refer to the de-epidermised  
305 dermis as *dermis*. Single cell suspensions of primary keratinocyte cells (20000), primary  
306 fibroblast cells (10000) and non-irradiated melanoma cells (1250; 5000; 8500), are seeded  
307 onto the dermis in full Green's medium as uniformly as possible, and incubated at 37 °C, in  
308 5% CO<sub>2</sub> and 95% air for two days. We refer to the primary keratinocyte and fibroblast cells  
309 as *skin cells*. Subsequently, the stainless steel rings are removed and the dermis containing  
310 cells is submerged in full Green's medium for a further two days. After this four-day pre-  
311 culture period, the spatial distribution of cells in the 3D experimental skin model is analysed.  
312 We also perform a series of equivalent experiments using irradiated melanoma cells.

313 All experiments are performed in triplicate. Furthermore, all experiments are repeated using  
314 primary skin cells and dermis from three separate donors to account for variability between  
315 different donors.

### 316 **MTT Assay**

317 An MTT (Thermo Scientific) assay is performed to check the metabolic activity of cells on  
318 the 3D experimental skin models. These assays are imaged with a stereo microscope (Nikon  
319 SMZ 800) fitted with a Nikon digital camera. We follow the protocol from Haridas *et al.* [7].

### 320 **Immunohistochemistry on 3D experimental skin models with melanoma cells**

321 We use immunohistochemistry to identify melanoma cells in the 3D experimental skin  
322 models. 10% neutral buffered formalin (United Biosciences, Australia) is used to fix the 3D  
323 experimental skin models. The tissue is divided through the centre of the MTT positive  
324 region using a sterile blade. The two smaller pieces of tissue are processed and embedded in  
325 paraffin. These samples are sectioned into 5  $\mu\text{m}$  thick sections using a microtome. These  
326 sections are de-paraffinised, rehydrated and then subjected to heat-mediated antigen retrieval  
327 treatment using sodium citrate buffer (pH 6.0) in a decloaking chamber (Biocare Medical,  
328 USA) at 95 °C for 5 minutes. Skin sections are washed in PBS followed by immunostaining  
329 using the MACH 4™ Universal HRP polymer kit (Biocare Medical). The primary antibody  
330 S100 (Dako, Australia) is diluted in DaVinci Green diluent (Biocare Medical) at 1:3000, and  
331 these sections are incubated with the primary antibody for one hour at room temperature.  
332 Positive immunoreactivity is visualized using 3,3-diaminobenzidine (DAB; Biocare Medical)  
333 and then counterstained with using Gill's haematoxylin (HD Scientific, Australia). The  
334 sections are dehydrated, and mounted on coverslips using Pertex® mounting medium  
335 (Mediate, Germany). All stained sections are imaged using an Olympus BX41 microscope

336 fitted with an Olympus digital camera (Micropublisher, 3.3RTV, QImaging; Olympus, Q-  
337 Imaging, Tokyo, Japan).

### 338 **IBM Simulation Methods**

339 We use a 3D lattice-based IBM, with adhesion between some agents, to describe the 3D  
340 experiments. In the IBM, cells are treated as equally sized spheres, and referred to as *agents*.  
341 We use a square lattice, with no more than one agent per site. The lattice spacing,  $\Delta$ ,  
342 represents the approximate size of each simulated agent. Here, we set  $\Delta = 20 \mu\text{m}$ . We use a  
343 3D lattice of cross section,  $3 \text{ mm} \times 3 \text{ mm}$ , and depth  $2 \text{ mm}$ , to represent the central region of  
344 each experimental skin model. The parameters in the simulation model are adapted from  
345 previous studies [17]. Since we use the 3D lattice to represent the central region of the tissue,  
346 where cells are initialised uniformly across the surface, we apply periodic boundary  
347 conditions along all vertical boundaries. Since cells cannot leave the skin through the upper  
348 or lower surfaces, we apply no flux conditions on the upper and lower horizontal boundaries  
349 of the 3D lattice. We choose the depth of the 3D lattice to be large enough so that the agents  
350 never touch the bottom boundary of the lattice on the time scale of the simulations we  
351 consider.

352 To initialise simulations, we randomly place a particular number of simulated skin agents  
353 ( $N_0^{(s)}$ ) and a particular number of simulated melanoma agents ( $N_0^{(m)}$ ) onto the surface of the  
354 lattice. When the IBM is initialised we take care to ensure that no more than one agent  
355 occupies each lattice site. We always choose the initial number of agents in each  
356 subpopulation to match the equivalent initial density of cells in the experimental skin model.  
357 In the experiments, the initial populations of cells are uniformly placed inside a disc of radius  
358  $3 \text{ mm}$ , whereas in the IBM the initial populations of agents are uniformly placed inside a  
359 square subregion of side length  $3 \text{ mm}$ . We set the initial number of skin agents to be  $N_0^{(s)} =$



360 9500 to match the initial experimental population of 30,000 skin cells distributed in a disc of  
361 radius 3 mm. We vary the initial number of simulated melanoma agents to be  $N_0^{(m)} = 400$ ,  
362 1600 or 2700, to match the initial experimental populations of 1250, 5000 and 8500  
363 melanoma cells distributed in a disc of radius 3 mm. To match the experiments, the IBM  
364 simulations run for four days.

365 At any time,  $t$ , there are  $N(t)$  agents on the lattice. In each discrete time step, of duration  $\tau$ , we  
366 allow motility and proliferation events to occur in the following two sequential steps:

367

368 1.  $N(t)$  agents are selected one at a time, with replacement and given the opportunity to  
369 move to a nearest neighbour lattice site with probability  $P_m^{(s,m)} \in [0,1]$ . The  
370 probability of movement depends on whether the agent is a skin agent or a melanoma  
371 agent since we know that skin cells are more motile than melanoma cells [18]. If the  
372 chosen agent is a melanoma agent, we incorporate adhesion into the model by  
373 examining the occupancy of the 26 nearest lattice sites in the 3D von Neumann  
374 neighbourhood. We count the number of those sites occupied by melanoma agents,  $a$   
375 [17]. Potentially motile melanoma agents then attempt to move with a modified  
376 probability,  $P_m^* = (1 - q)^a$ , which accounts for adhesion between neighbouring  
377 melanoma agents. The parameter  $q$  controls the strength of melanoma-melanoma  
378 agent adhesion, with  $q=0$  corresponding to no adhesion, and increasing  $q$  leading to  
379 increased adhesion [18]. Setting  $q=1$  corresponds to maximal adhesion, and this  
380 would prevent any motility of melanoma agents that are in contact with other  
381 melanoma agents. We do not include any adhesion for the motion of skin agents. To  
382 simulate crowding effects, potential motility events that would place an agent on an  
383 occupied site are aborted.

384

385 2.  $N(t)$  agents are selected one at a time, with replacement and given the opportunity to  
386 proliferate with probability  $P_p^{(s,m)} \in [0,1]$ . The probability of proliferation depends on  
387 whether the agent is a melanoma agent or a skin agent [17]. If a proliferation event is  
388 successful, a daughter agent is placed at a randomly chosen nearest neighbour lattice  
389 site in the 3D Moore neighbourhood. To simulate crowding effects, we abort the  
390 proliferation event if all six nearest neighbouring sites are occupied. In all cases where  
391 a proliferation event is successful, a proliferative melanoma agent will produce a  
392 daughter melanoma agent, and a proliferative skin agent will produce a daughter skin  
393 agent.

394 The parameters in the IBM are  $\Delta$ ,  $\tau$ ,  $P_m^{(s)}$ ,  $P_m^{(m)}$ ,  $P_p^{(s)}$ ,  $P_p^{(m)}$  and  $q$ . These IBM parameters are  
395 related to the cell proliferation rates ( $\lambda^{(s)} = P_p^{(s)} / \tau$ ,  $\lambda^{(m)} = P_p^{(m)} / \tau$ ) and cell diffusivities ( $D^{(s)} =$   
396  $P_m^{(s)} \Delta^2 / (6\tau)$ ,  $D^{(m)} = P_m^{(m)} \Delta^2 / (6\tau)$ ).

397

398

399

400

401

402

403

404

405

406 **Declarations**

407

408 **Acknowledgements** We thank Brian Gabrielli for the SK-MEL-28 cell line.

409

410 **Availability of data and material** All data generated and/or analysed supporting the  
411 outcome of this manuscript is included within this manuscript and in the additional files.

412

413 **Competing Interests** The authors declare no competing interests.

414

415 **Authors' contributions**

416 PH and MJS conceived the study. PH, APB, JAM, DLMS and MJS designed the  
417 experiments. PH performed the experiments. APB performed the mathematical simulations.  
418 PH and APB analysed the data. PH and MJS wrote the manuscript. PH, APB, JAM, DLMS  
419 and MJS read, edited and approved the final manuscript.

420

421 **Funding** We are supported by the Australian Research Council (DP170100474)

422

423

424

425

## 426 **References**

- 427 1. Beaumont KA, Mohana-Kumaran N, Haass NK. Modeling melanoma *in vitro* and *in*  
428 *vivo*. *Healthcare*. 2014;2:27-46. doi: [10.3390/healthcare2010027](https://doi.org/10.3390/healthcare2010027)
- 429 2. Meier F, Nesbit M, Hsu M, Martin B, Belle PV, Elder DE, Schaumburg-Lever G,  
430 Garbe C, Walz TM et al. Human melanoma progression in skin reconstructs:  
431 biological significance of bFGF. *Am J Pathol*. 2000;156:193-200. doi:  
432 [10.1016/S0002-9440\(10\)64719-0](https://doi.org/10.1016/S0002-9440(10)64719-0)
- 433 3. Balu M, Kelly KM, Zachary CB, Harris RM, Krasieva TB, Konig K, Durkin AJ,  
434 Tromberg BJ. Distinguishing between benign and malignant melanocytic nevi by *in*  
435 *vivo* multiphoton microscopy. *Cancer Res*. 2014;74:2688-2697. doi:[10.1158/0008-](https://doi.org/10.1158/0008-5472.CAN-13-2582)  
436 [5472.CAN-13-2582](https://doi.org/10.1158/0008-5472.CAN-13-2582)
- 437 4. Urso C, Rongioletti F, Innocenzi D, Batolo D, Chimenti S, Fanti PL, Filotico R,  
438 Gianotti R, Lentini M, Tomasini C, et al. Histological features used in the diagnosis of  
439 melanoma are frequently found in benign melanocytic naevi. *J Clin Pathol*.  
440 2005;58:409-412. doi: [10.1136/jcp.2004.020933](https://doi.org/10.1136/jcp.2004.020933)
- 441 5. Wessels D, Lusche DF, Voss E, Kuhl S, Buchele EC, Klemme MR, Russell KB,  
442 Ambrose J, Sol BA, Bossler A et al. Melanoma cells undergo aggressive coalescence  
443 in a 3D Matrigel model that is repressed by anti-CD44. *PLoS ONE*.  
444 2017;12:e0173400. doi: [10.1371/journal.pone.0173400](https://doi.org/10.1371/journal.pone.0173400)
- 445 6. Eves P, Layton C, Hedley S, Dawson RA, Wagner M, Morandini R, Ghanem G, Mac  
446 Neil S. Characterization of an *in vitro* model of human melanoma invasion based on  
447 reconstructed human skin. *Brit J Dermatol*. 2000;142:210-222. doi:[10.1046/j.1365-](https://doi.org/10.1046/j.1365-2133.2000.03287.x)  
448 [2133.2000.03287.x](https://doi.org/10.1046/j.1365-2133.2000.03287.x)
- 449 7. Haridas P, McGovern JA, McElwain DLS, Simpson MJ. Quantitative comparison of  
450 the spreading and invasion of radial growth phase and metastatic melanoma cells in a

- 451 three-dimensional human skin equivalent model. PeerJ. 2017;**5**:e3754. doi:  
452 [10.7717/peerj.3754](https://doi.org/10.7717/peerj.3754)
- 453 8. MacNeil S, Eves P, Richardson B, Molife R, Lorigan P, Wagner M, Layton C, Moran  
454 dini R, Ghanem G. Oestrogenic steroids and melanoma cell interaction with adjacent  
455 skin cells influence invasion of melanoma cells *in vitro*. Pigment Cell Res.  
456 2000;13:68-72. doi: 10.1034/j.1600-0749.13.s8.13.x
- 457 9. Treloar KK, Simpson MJ, Haridas P, Manton KJ, Leavesley DI, McElwain DLS,  
458 Baker RE. Multiple types of data are required to identify the mechanisms influencing  
459 the spatial expansion of melanoma cell colonies. BMC Syst Biol. 2013;**7**:137. doi:  
460 [10.1186/1752-0509-7-137](https://doi.org/10.1186/1752-0509-7-137)
- 461 10. Carey TE, Takahashi T, Resnick LA, Oettgen HF, Old LJ. Cell surface antigens of  
462 human malignant melanoma: mixed hemadsorption assays for humoral immunity to  
463 cultured autologous melanoma cells. P Natl Acad Sci USA. 1976;**73**:3278-3282.  
464 doi:[10.1073/pnas.73.9.3278](https://doi.org/10.1073/pnas.73.9.3278)
- 465 11. Deacon DH, Hogan KT, Swanson EM, Chianese-Bullock KA, Denlinger CE,  
466 Czarkowski AR, Schrecengost RS, Patterson JW, Teague MW, Slingluff Jr CL. The  
467 use of gamma-irradiation and ultraviolet-irradiation in the preparation of human  
468 melanoma cells for use in autologous whole-cell vaccines. BMC Cancer 2008;**8**:360.  
469 doi: [10.1186/1471-2407-8-360](https://doi.org/10.1186/1471-2407-8-360)
- 470 12. Todorovic D, Petrovic I, Todorovic M, Cuttone G, Ristic-Fira A. Early effects of  
471 gamma rays and protons on human melanoma cell viability and morphology. J  
472 Microsc-Oxford. 2008;**232**:517-521. doi: [10.1111/j.1365-2818.2008.02151.x](https://doi.org/10.1111/j.1365-2818.2008.02151.x)
- 473 13. Schneider CA, Rasband WS, Eliceiri KW. NIH image to ImageJ: 25 years of image  
474 analysis. Nat Methods. 2017;**9**:671-675. doi:[10.1038/nmeth.2089](https://doi.org/10.1038/nmeth.2089)

- 475 14. Simpson MJ, Treloar KK, Binder BJ, Haridas P, Manton KJ, Leavesley DI, McElwain  
476 DLS, Baker RE. Quantifying the roles of cell motility and cell proliferation in a  
477 circular barrier assay. *J R Soc Interface*. 2013;10:20130007. doi:  
478 [10.1098/rsif.2013.0007](https://doi.org/10.1098/rsif.2013.0007)
- 479 15. Haridas P, McGovern JA, Kashyap AS, McElwain DLS, Simpson MJ. Standard  
480 melanoma-associated markers do not identify the MM127 metastatic melanoma cell  
481 line. *Sci Rep*. 2016;6:24569. doi: [10.1038/srep24569](https://doi.org/10.1038/srep24569)
- 482 16. Read MN, Alden K, Rose LM, Timmis J. Automated multi-objective calibration of  
483 biological agent-based simulations. *J R Soc Interface*. 2016;13:20160543. doi:  
484 [10.1098/rsif.2016.0543](https://doi.org/10.1098/rsif.2016.0543)
- 485 17. Haridas P, Penington CJ, McGovern JA, McElwain DLS, Simpson MJ. Quantifying  
486 rates of cell migration and cell proliferation in co-culture barrier assay reveals how  
487 skin and melanoma cells interact during melanoma spreading and invasion. *J Theor*  
488 *Biol*. 2017;423:13-25. doi: [10.1016/j.jtbi.2017.04.017](https://doi.org/10.1016/j.jtbi.2017.04.017)
- 489 18. Simpson MJ, Towne C, McElwain DLS, Upton Z. Migration of breast cancer cells:  
490 understanding the roles of volume exclusion and cell-to-cell adhesion. *Phys Rev E*.  
491 2010;82:041901. doi: [10.1103/PhysRevE.82.041901](https://doi.org/10.1103/PhysRevE.82.041901)
- 492 19. Gerlee P. The model muddle: in search of tumor growth laws. *Cancer Res*.  
493 2013;73:2407-2411 doi: [10.1158/0008-5472.CAN-12-4355](https://doi.org/10.1158/0008-5472.CAN-12-4355)
- 494 20. Vo BN, Drovandi CC, Pettitt AN, Simpson MJ. Quantifying uncertainty in parameter  
495 estimates for stochastic models of collective cell spreading using Approximate  
496 Bayesian Computation. *Math Biosci*. 2015;263:133-142. doi:  
497 [10.1016/j.mbs.2015.02.010](https://doi.org/10.1016/j.mbs.2015.02.010)

- 498 21. Green JEF, Waters SL, Whiteley JP, Edelstein-Keshet L, Shakesheff KM, Byrne HM.  
499 Non-local models for the formation of hepatocyte-stellate cell aggregates. *J Theor*  
500 *Biol.* 2010;267:106-120. doi: [10.1016/j.jtbi.2010.08.013](https://doi.org/10.1016/j.jtbi.2010.08.013)
- 501 22. Chan KS, Koh CG, Li HY. Mitosis-targeted anti-cancer therapies: where they stand.  
502 *Cell Death Dis.* 2012;3:e411. doi:[10.1038/cddis.2012.148](https://doi.org/10.1038/cddis.2012.148)
- 503 23. Ramaraj P. *In vitro* inhibition of human melanoma (BLM) cell growth by  
504 progesterone receptor antagonist RU-486 (Mifprestone). *J Cancer Ther.* 2016;7:1045-  
505 1058. doi: [10.4236/jct.2016.713101](https://doi.org/10.4236/jct.2016.713101)
- 506 24. Lai X, Friedman A. Combination therapy for melanoma with BRAF/MEK inhibitor  
507 and immune checkpoint inhibitor: a mathematical model. *BMC Syst Biol.*  
508 2017;11:70. doi: [10.1186/s12918-017-0446-9](https://doi.org/10.1186/s12918-017-0446-9)
- 509 25. Dawson RA, Upton Z, Malda J, Harkin DG. Preparation of cultured skin for  
510 transplantation using insulin-like growth factor I in conjunction with insulin-like  
511 growth factor binding protein 5, epidermal growth factor, and vitronectin.  
512 *Transplantation.* 2006;81:1668-1676. doi: [10.1097/01.tp.0000226060.51572.89](https://doi.org/10.1097/01.tp.0000226060.51572.89)
- 513

514 Figure 1: **Mechanisms that drive melanoma nest formation.** Schematics illustrating: (A)  
515 proliferation-driven nests; and (B) migration-driven nests. In both cases the schematic shows  
516 an initially-uniform distribution of cells that lead to the formation of a nest either by the  
517 action of proliferation (A) or migration (B).

518



519 **Figure 2: Two-dimensional spatial expansion of irradiated and non-irradiated**  
520 **melanoma cell monocultures.** (A) Experimental images show barrier assays initialised with  
521 approximately 10000 melanoma cells. The upper row of images show non-irradiated  
522 (proliferative) melanoma cells, and the lower row shows irradiated (non-proliferative)  
523 melanoma cells. The images show the spreading of cell populations at zero, two and four  
524 days, respectively. The scale bar is 2 mm in each image. (B) Experimental images from (A)  
525 analysed by ImageJ. Results show the position of the leading edge of the spreading  
526 population (red) superimposed on images of the spreading populations. The upper row of  
527 images corresponds to non-irradiated melanoma cells, and the lower row of images show  
528 irradiated melanoma cells. The images show the spreading of cell populations at zero, two  
529 and four days, respectively. The scale bar in each image is 3 mm. (C) and (D) Data shows the  
530 average diameter of the spreading populations as a function of time (n=3). All data generated  
531 using non-irradiated melanoma cells is in blue, and data generated using irradiated melanoma  
532 cells is in red. Plots in (D) also show the variability. The error bars correspond to the sample  
533 standard deviation (n=3).

534

535 Figure 3: **Proliferation drives melanoma nest formation.** (A) MTT assays show all  
536 metabolically active cells (light purple) on the surface of the 3D experimental skin model  
537 initialised with different numbers of proliferating melanoma cells, as indicated. (B)  
538 Equivalent results with irradiated melanoma cells. Melanoma nests are in dark purple  
539 (arrows). Scale bars are 1 mm. (C)-(D) Box plots showing nest area as a function of initial  
540 number of melanoma cells. Inset in (D) shows details in the range 0-0.045 mm<sup>2</sup>.

541

542 **Figure 4: Irradiated and non-irradiated melanoma cells survive in 3D experimental skin**  
543 **models.** S100 identifies melanoma cells (brown), and the arrows indicate positive staining.  
544 (A), (C) and (E) Cross-sections through 3D experimental skin models initialised with 1250,  
545 5000 and 8500 non-irradiated melanoma cells, as indicated. (B), (D), and (F) Cross-sections  
546 through 3D experimental skin models initialised with 1250, 5000 and 8500 irradiated  
547 melanoma cells, respectively. Scale bar in each image is 100  $\mu$ m.

548

549 **Figure 5: Donor variability in 3D experimental skin models with melanoma cells.**

550 Experimental images show metabolically active cells (light purple) on the 3D experimental  
551 skin model after four days. The skin models are constructed using primary skin cells and  
552 dermis from three different donor samples denoted A; B; and C. The scale bars are 1 mm.  
553 The melanoma nests are shown in dark purple. In each set of subfigures, (A)-(C), the images  
554 in the upper row show experiments initialised with 1250, 5000 and 8500 non-irradiated  
555 melanoma cells, respectively. In each set of subfigures, (A)-(C), the images in the lower row  
556 show experiments initialised with 1250, 5000 and 8500 irradiated melanoma cells,  
557 respectively.

558

559 **Figure 6: IBM simulations corroborate experiments.** (A) Experimental image showing all  
560 metabolically active cells (light purple) on a 3D experimental skin model initialised with  
561 5000 proliferating melanoma cells. The magnified 3 mm × 3 mm region shows melanoma  
562 nests (dark purple). (B) Sub-region of the 3D simulated skin model with simulated skin  
563 agents (green) and simulated melanoma agents (blue). The dimension of the upper surface is  
564 0.8 mm × 0.8 mm, and the depth is 0.4 mm. (C) Upper surface of the simulated skin model.  
565 (D) Cross-section through the simulated skin model. (E)-(F) Experimental and simulated  
566 nests initiated with varying numbers of melanoma cells, as indicated, and an equivalent  
567 density of simulated melanoma agents, respectively. Results in (E) correspond to non-  
568 irradiated (proliferative) melanoma cells/agents. Results in (F) correspond to irradiated (non-  
569 proliferative) melanoma cells/agents. Images in (E)-(F) have dimensions 3 mm × 3 mm, and  
570 the depth is 2 mm. IBM parameters are  $\tau = 0.01$  h;  $\Delta = 20$   $\mu$ m;  $P_p^{(m)} = 0.0004$ ;  $P_m^{(m)} = 0.0075$ ;  
571  $P_p^{(s)} = 0.00025$ ;  $P_m^{(s)} = 0.0075$ ; and  $q = 0.7$ . Simulations with suppressed melanoma  
572 proliferation use  $P_p^{(m)} = 0.0$ .

**A**

Uniformly distributed melanoma cells

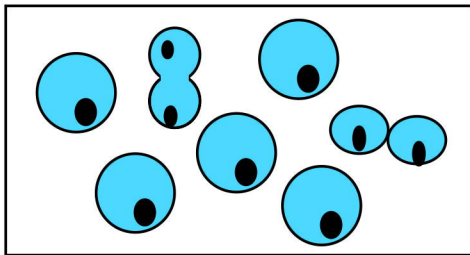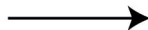

Proliferation-driven nest

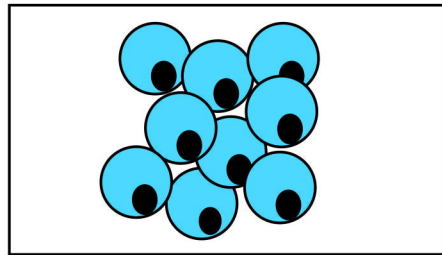**B**

Uniformly distributed melanoma cells

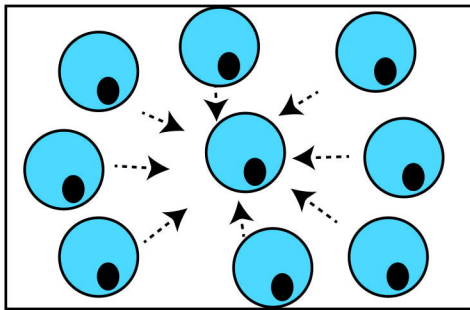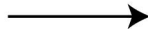

Motility-driven nest

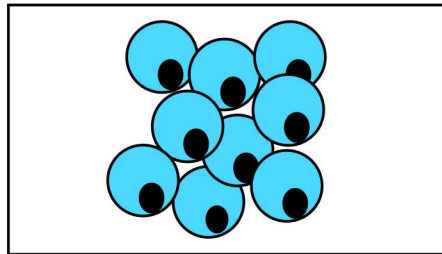

A

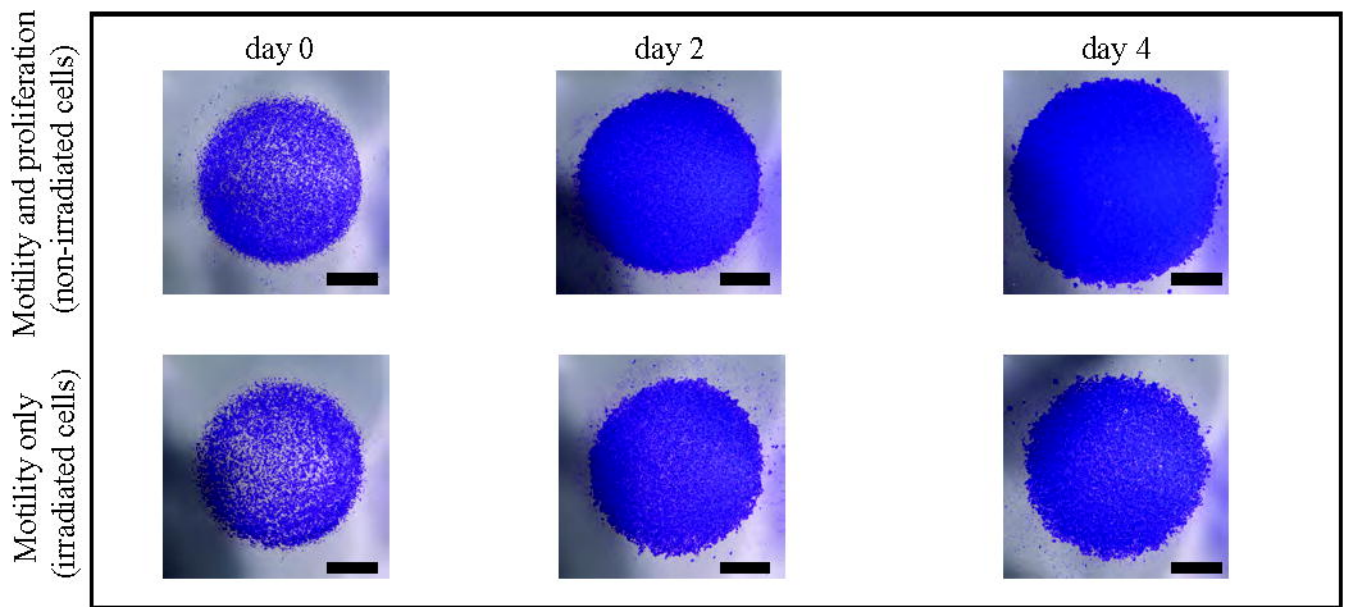

B

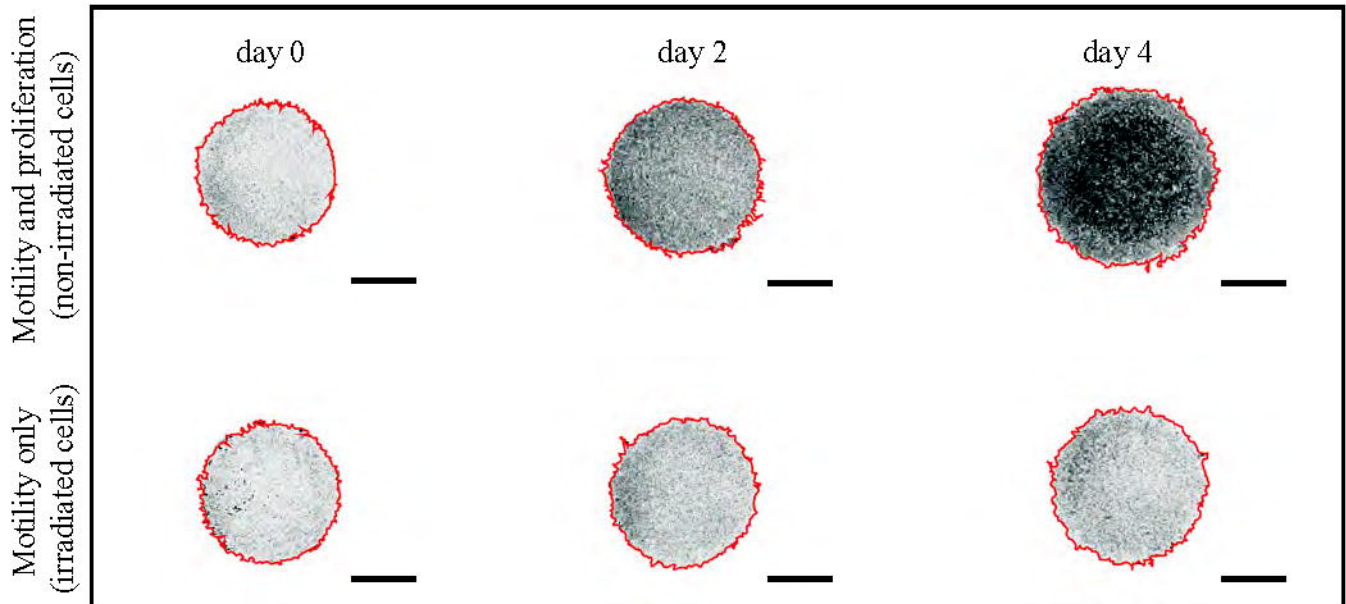

C

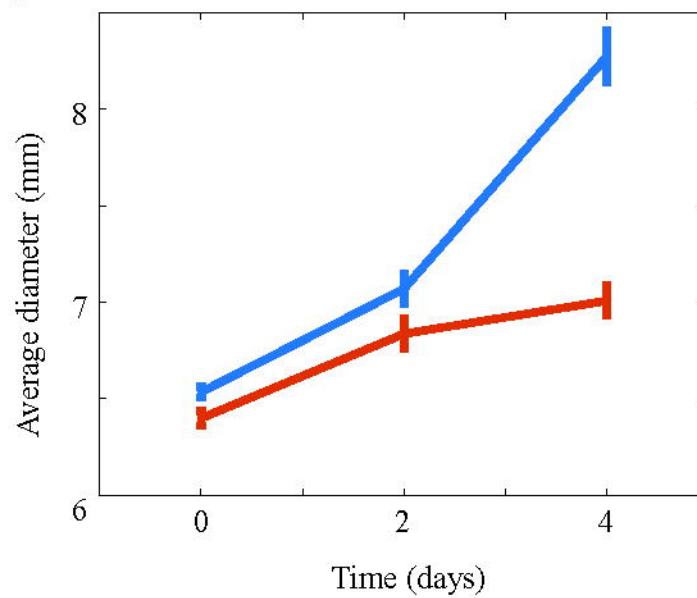

■ Motility and proliferation (non-irradiated cells) ; ■ Motility only (irradiated cells)

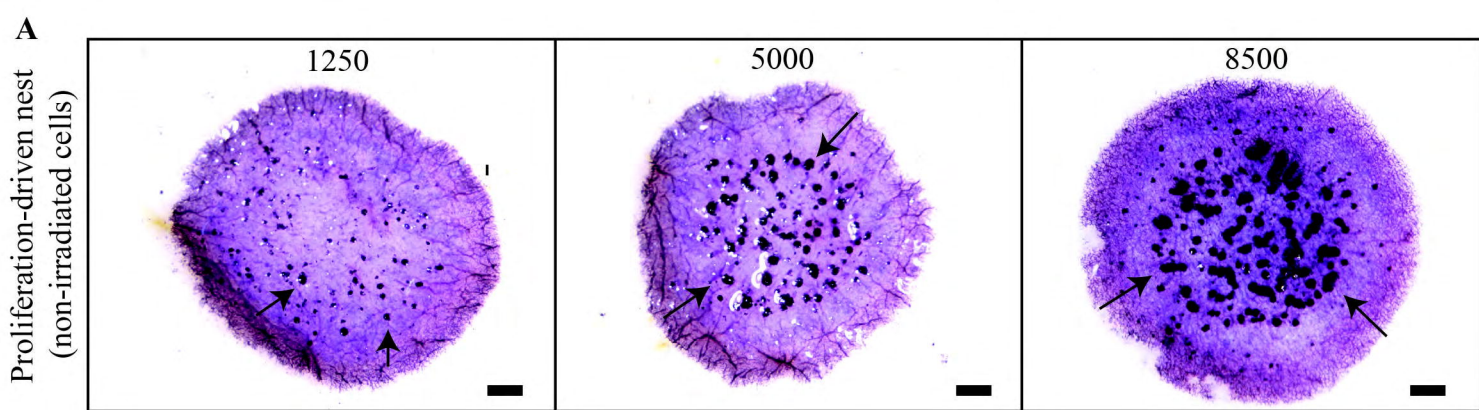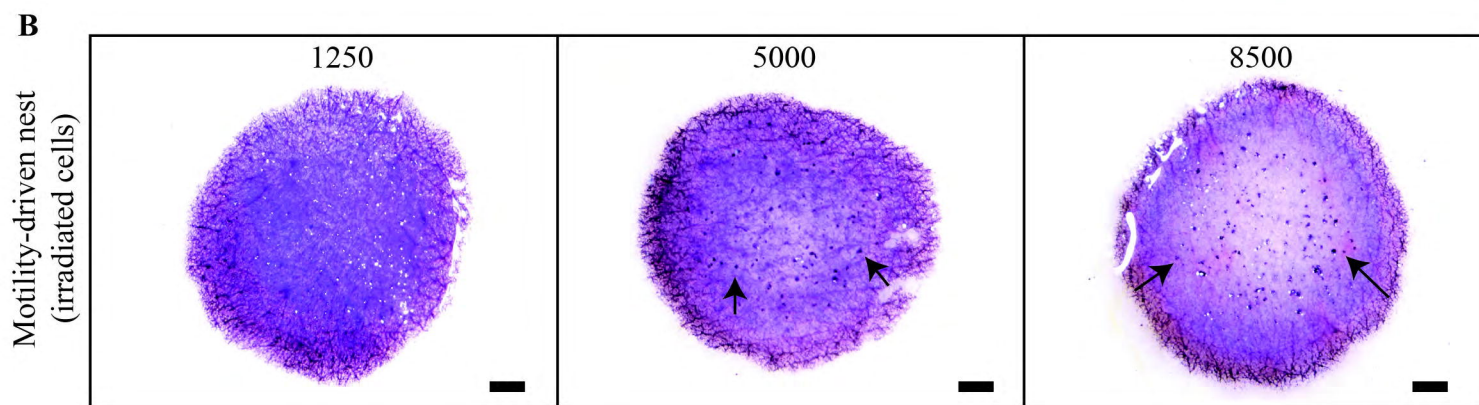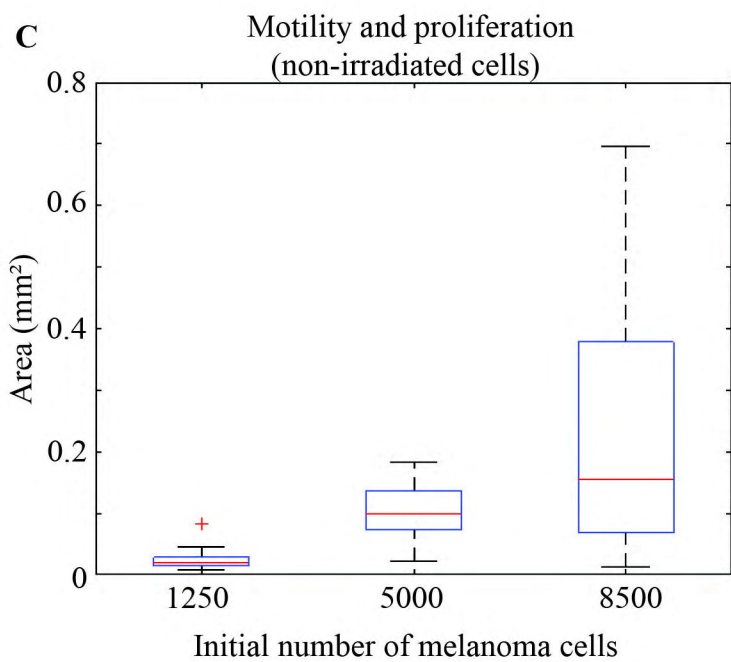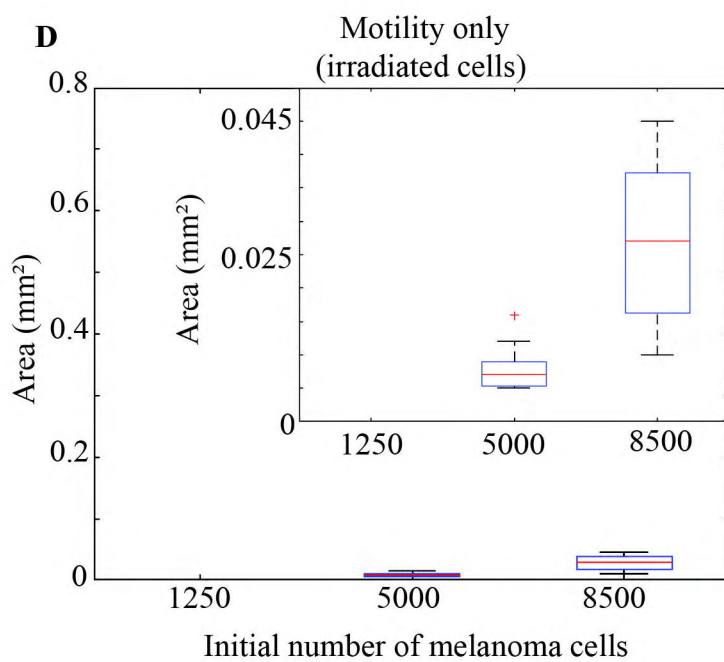



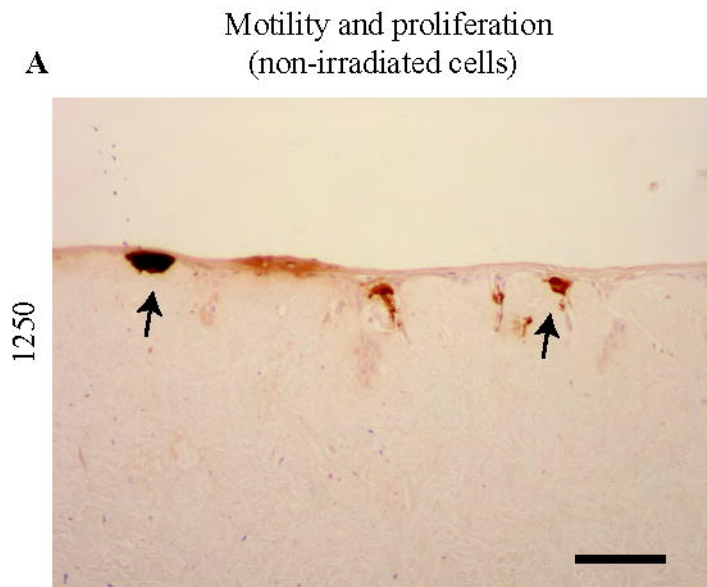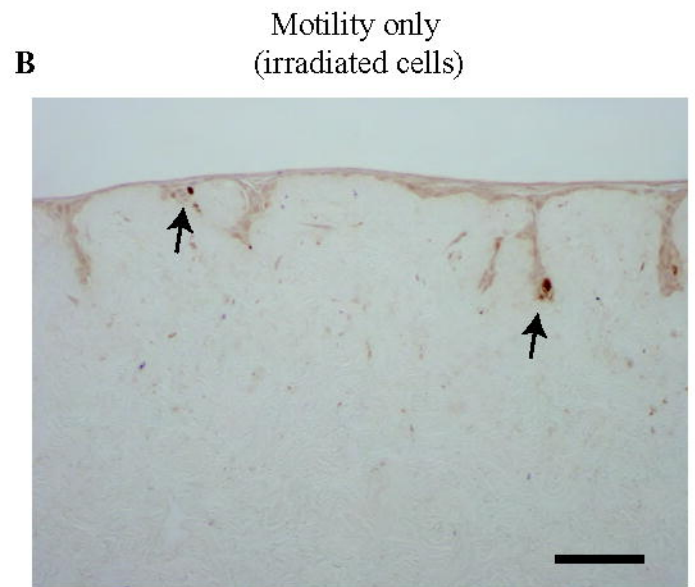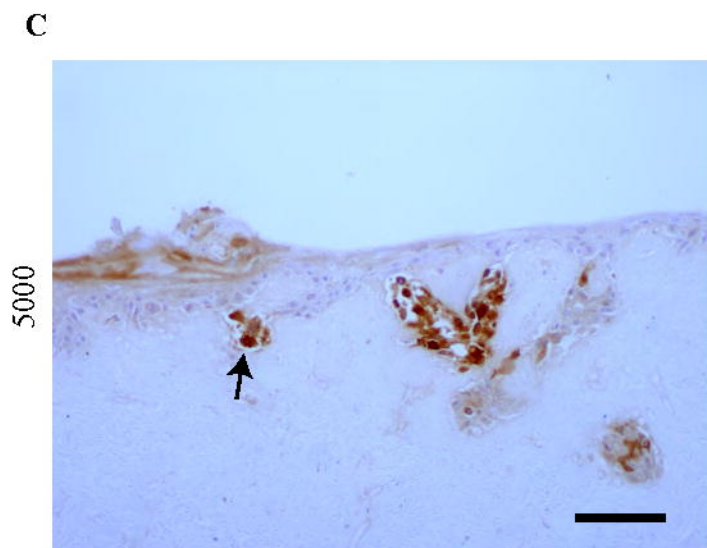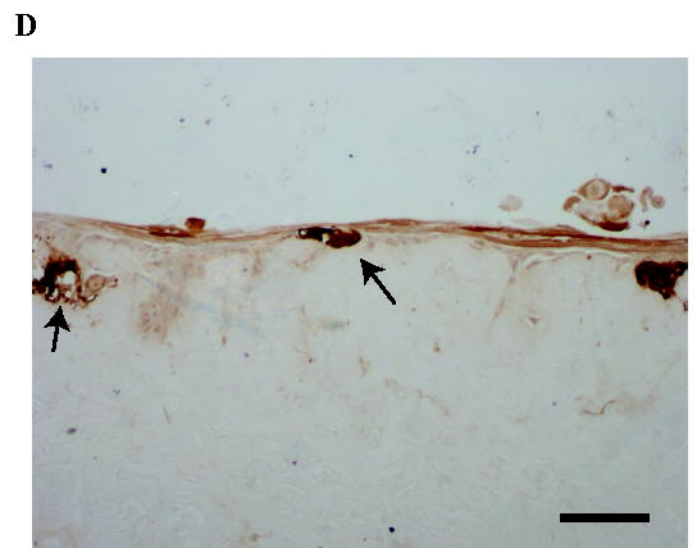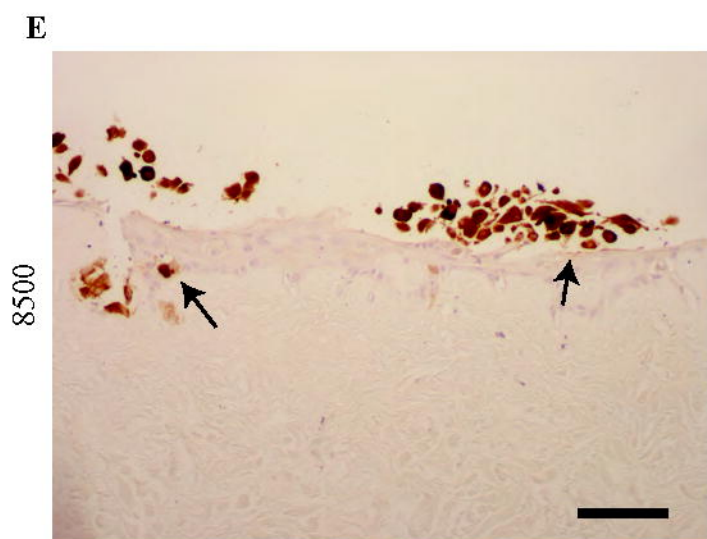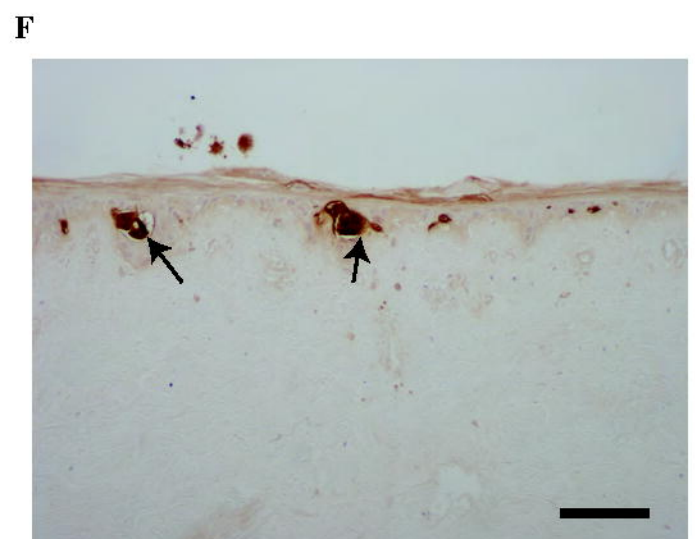

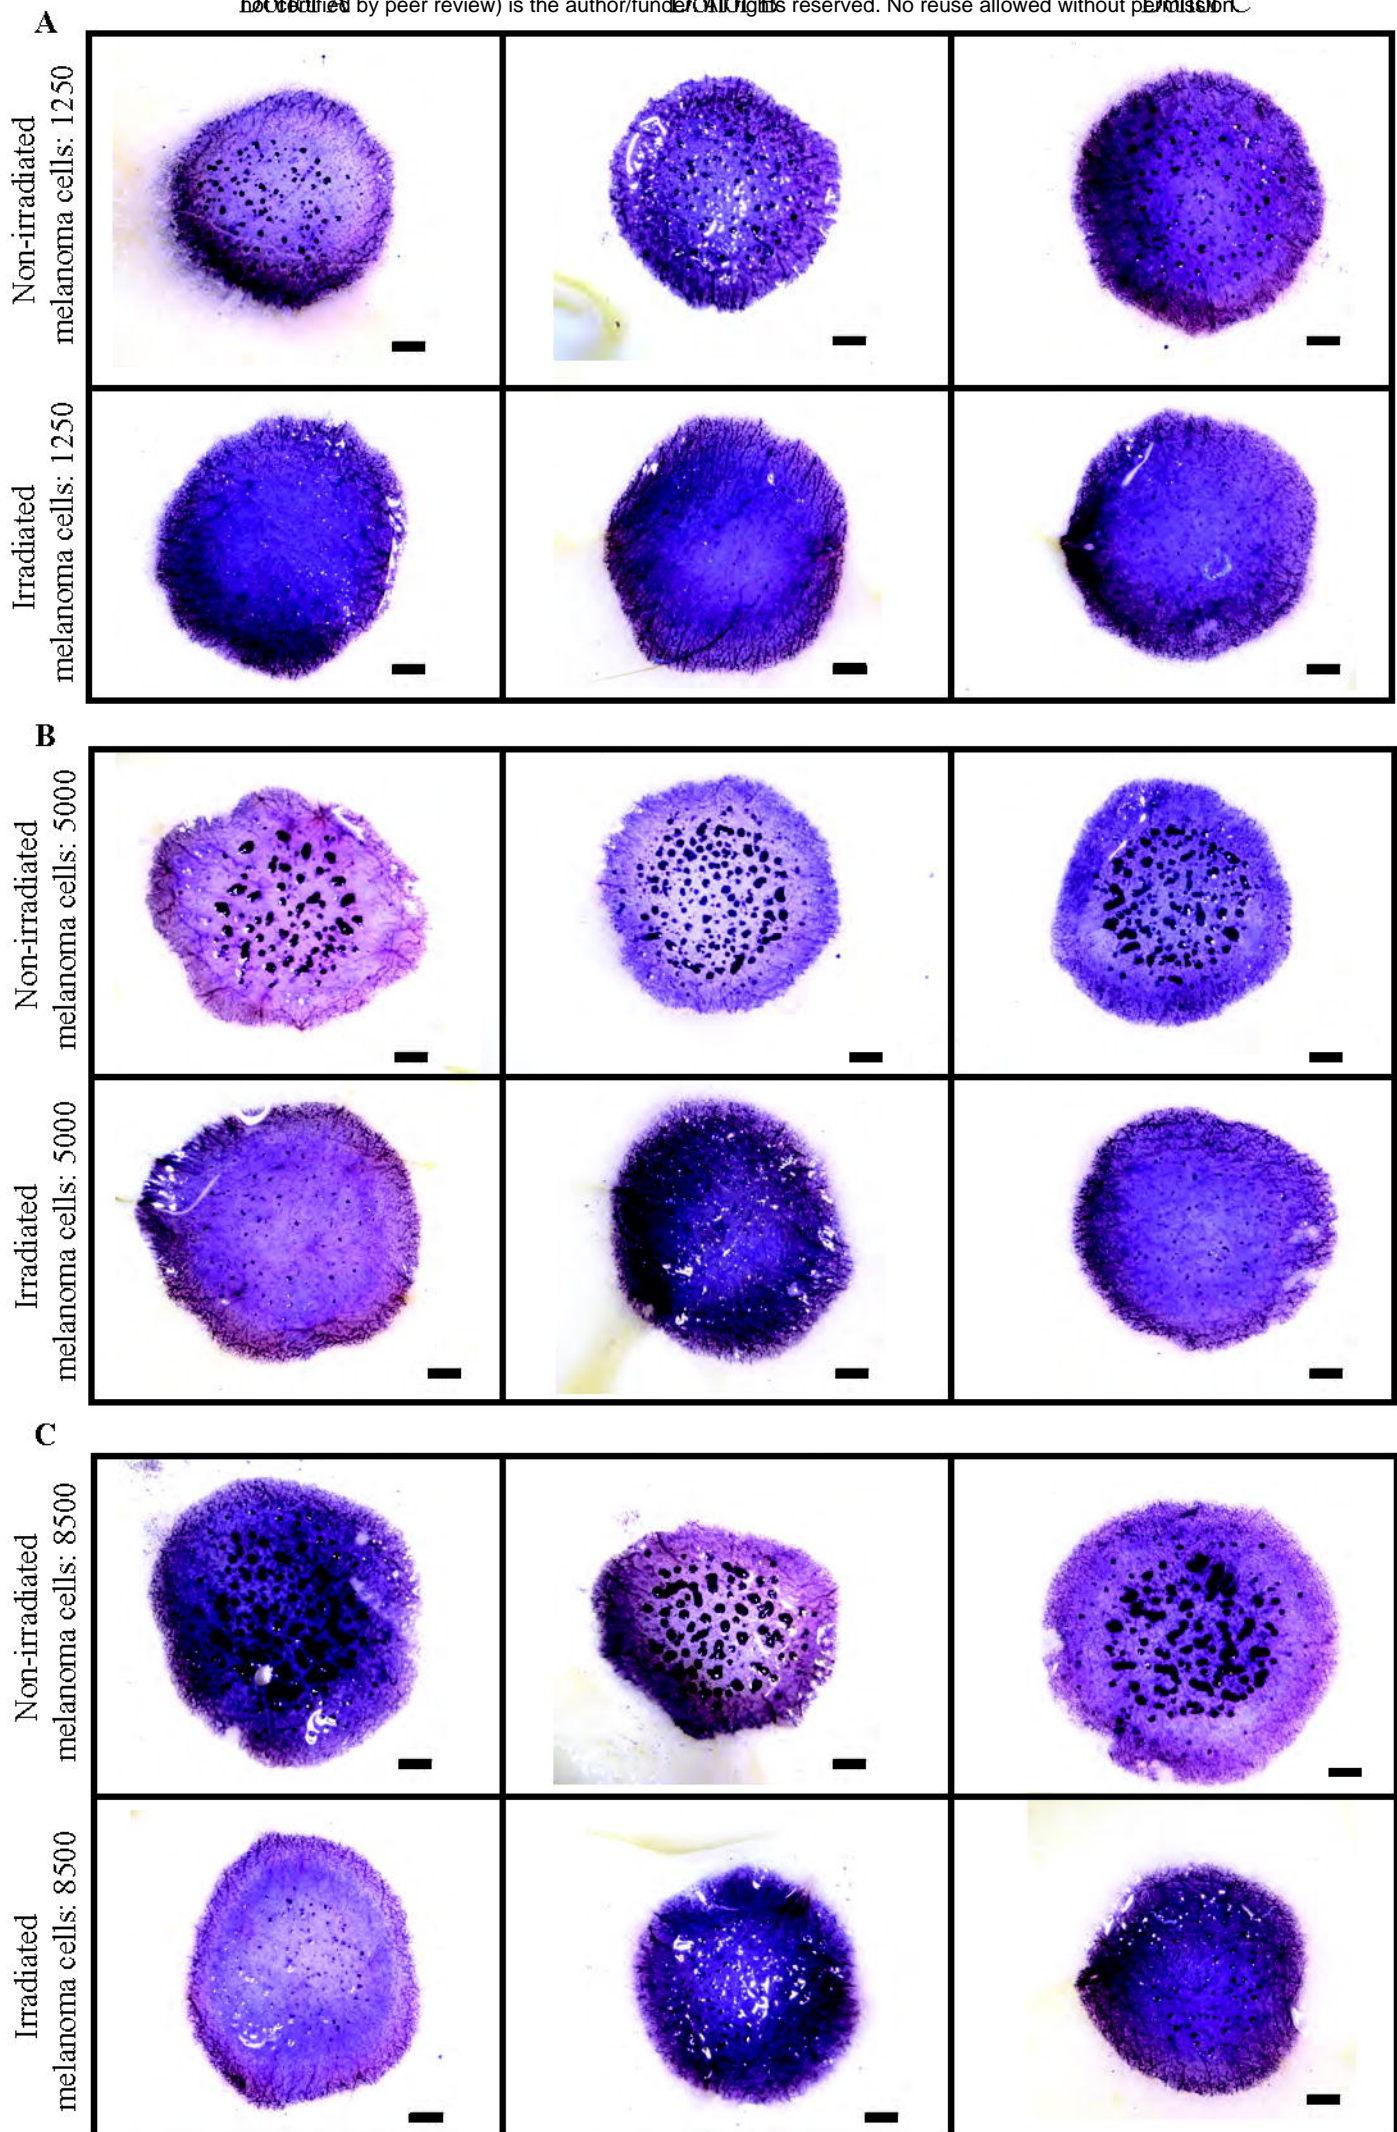

**A** 3D experimental skin model

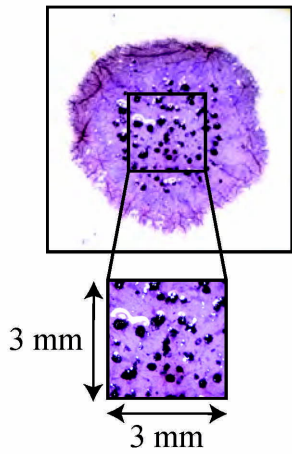

**B** 3D simulated skin model

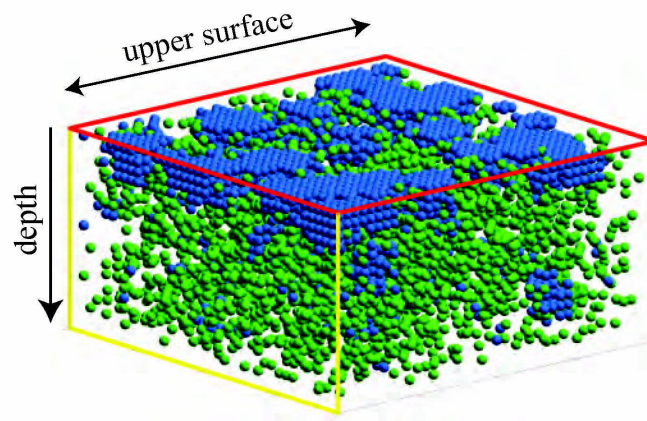

**C** simulated skin surface

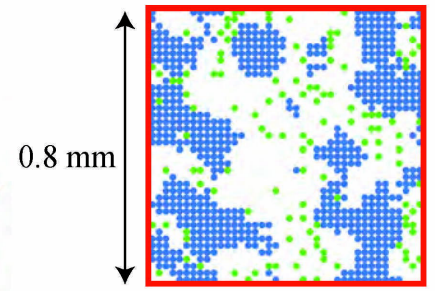

**D** cross-section through simulated skin

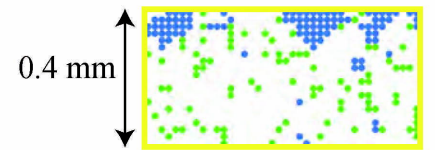

● Simulated melanoma agent; ● Simulated skin agent

**E** Motility and proliferation

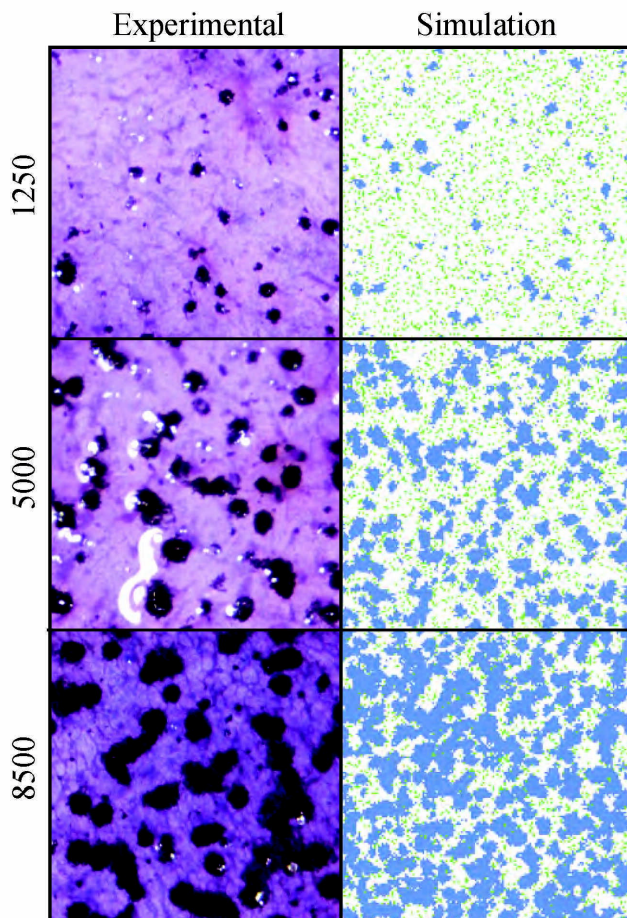

**F** Motility only

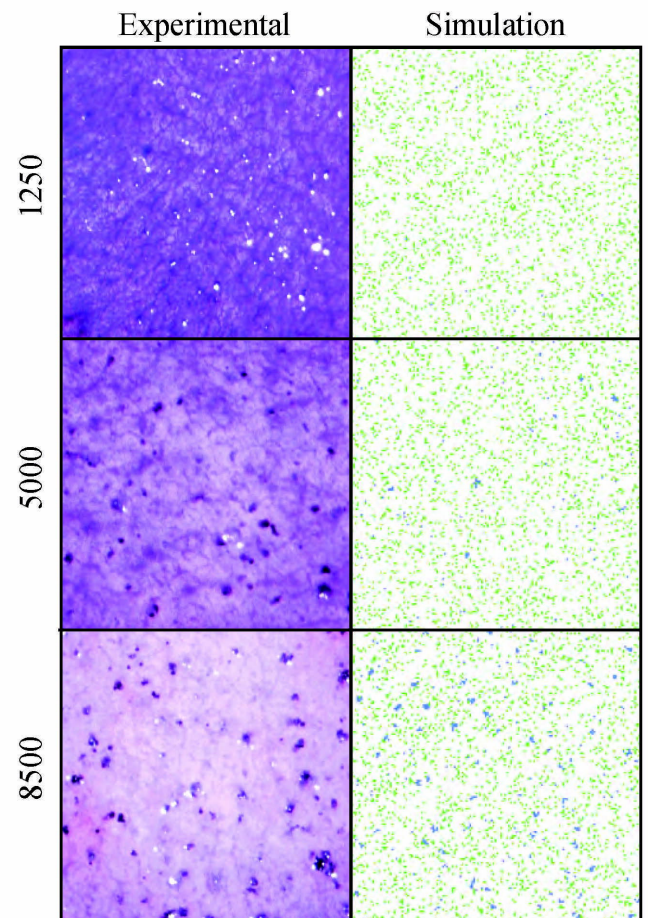

Source: https://www.biorxiv.org/content/10.1101/244582v1.full.pdf
